# Supplementary material
Source: Springer Nature journal article supplement (https://www.springermedizin.de/resource/supplementary/12967_2012_1468_MOESM3_ESM.pdf/9574330)

## Good Pathological Responders (Groups I and II)

% of Tregs (CD4<sup>+</sup>CD25<sup>+</sup> CD127<sup>-</sup> FOXP3<sup>+</sup>)

**Baseline**  
(4.1%)

**Post-chemotherapy**  
(1.50%)

**Post-surgery**  
(2.10%)

**Healthy Donors**  
(0.14%)

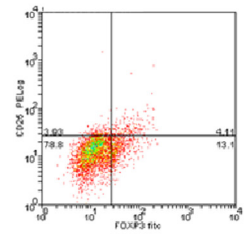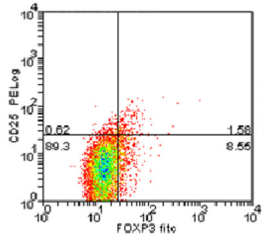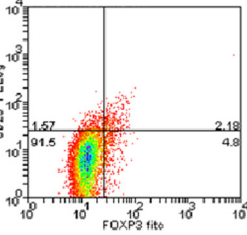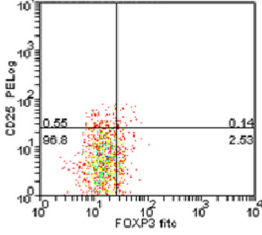

## Poor Pathological Responders (Groups III and IV)

% of Tregs (CD4<sup>+</sup>CD25<sup>+</sup> CD127<sup>-</sup> FOXP3<sup>+</sup>)

**Baseline**  
(4.08%)

**Post-chemotherapy**  
(3.1%)

**Post-surgery**  
(3.64%)

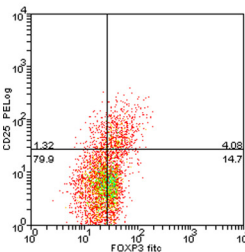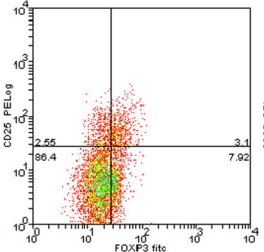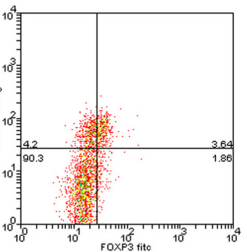

## Good Pathological Responders (Groups I and II)

AbNs of Monocytic (CD11b<sup>+</sup> CD14<sup>+</sup> HLA DR<sup>-</sup> CD124<sup>+</sup> CD33<sup>+</sup>) MDSC

**Baseline**  
(42 cells/ul)

**Post-chemotherapy**  
(21 cells/ul)

**Post-surgery**  
(10 cells/ul)

**Healthy Donors**  
(8 cells/ul)

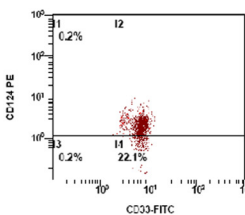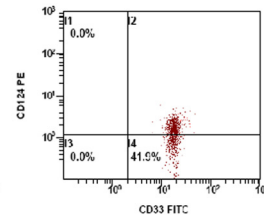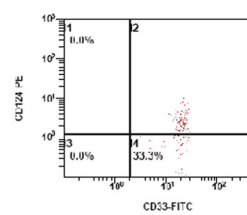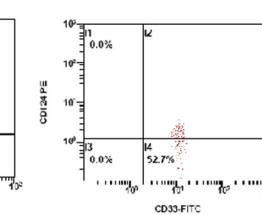

## Good Pathological Responders (Groups I and II)

AbNs of Granulocytic (CD11b<sup>+</sup> CD14<sup>-</sup> CD66b<sup>+</sup> CD124<sup>+</sup> CD15<sup>+</sup>) MDSCs

**Baseline**  
(150 cells/ul)

**Post-chemotherapy**  
(80 cells/ul)

**Post-surgery**  
(60 cells/ul)

**Healthy Donors**  
(85 cells/ul)

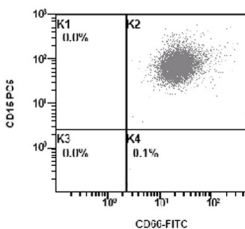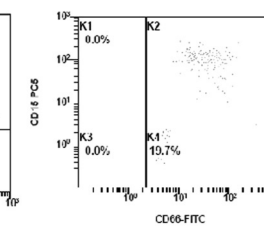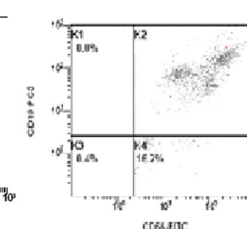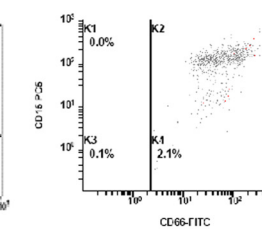

Supplement: MOESM3 [file 9574330]
